# Supplementary material
Source: HighWire-hosted journal article supplement (https://bmjopen.bmj.com/content/9/8/e026162)
Supplement: inline-supplementary-material-2 [file inline-supplementary-material-2.pdf]

Additional file 2 The validated 17-item TIS for Chinese tertiary hospital physician (English version and Chinese version).

| Items                                                                                        | Dimensions    |
|----------------------------------------------------------------------------------------------|---------------|
| 01. The team members communicate intensively with each other.                                | Communication |
| 01. 您所在团队的成员之间沟通很深入                                                                          | 沟通            |
| 02. I'm completely content with the exactness of information provided by other team members. | Communication |
| 02. 您对团队其他成员所提供信息的准确性感到满意                                                                    | 沟通            |
| 03. The team members share opinions and information spontaneously                            | Coordination  |
| 03. 您所在团队成员之间自发地分享意见和信息                                                                      | 协调            |
| 04. The team members adjust closely the processing of their tasks                            | Coordination  |
| 04. 团队成员在任务完成的过程中紧密协调                                                                        | 协调            |
| 05. Within the team related tasks are well coordinated.                                      | Coordination  |
| 05. 在团队内部，工作任务能被很好地组织协调                                                                      | 协调            |
| 06. The team members support and complement each other as well as they can.                  | Mutual help   |
| 06. 您所在团队成员之间尽可能地互相帮助和支持                                                                     | 相互支持          |

---

|                                                                                              |             |
|----------------------------------------------------------------------------------------------|-------------|
| 07. Discussions among the team members are always constructive and beneficial.               | Mutual help |
| 07. 您所在团队成员之间的讨论通常是富有建设性和有利于工作的                                                              | 相互支持        |
| 08. Proposals and contributions of the team members are always respected                     | Mutual help |
| 08. 团队成员的建议和贡献总是能得到大家的尊重                                                                     | 相互支持        |
| 09. The team members reach consensus in every important issue                                | Team goals  |
| 09. 团队成员在重要问题上能达成一致                                                                          | 团队共识        |
| 10. Every team member perceives herself/himself as responsible for the clinical team's goals | Team goals  |
| 10. 每位团队成员都认为自己对团队的目标有责任                                                                     | 团队共识        |
| 11. The team members share the workload of the team equally.                                 | Work norms  |
| 11. 每位团队成员平等地分担团队的工作量                                                                        | 工作规范        |
| 12. Every team member works as best as she/he can in order to achieve the team's goals.      | Work norms  |
| 12. 每位团队成员为完成团队目标尽自己最大努力工作                                                                   | 工作规范        |
| 13. Every team member is completely integrated in the team                                   | Work norms  |

---

---

|                                                                                                                          |                                     |
|--------------------------------------------------------------------------------------------------------------------------|-------------------------------------|
| 13. 每位团队成员都完全融入到团队里                                                                                                      | 工作规范                                |
| 14. Working in the team has the highest priority for every team member (in comparison with other jobs and private life). | Cohesion and<br>conflict resolution |
| 14. 与其它工作和个人生活相比，成员最优先考虑团队的工作                                                                                            | 凝聚力与冲突解决                            |
| 15. Strong cohesion is a characteristic of the team.                                                                     | Cohesion and<br>conflict resolution |
| 15. 您所在团队具有强大的内聚力                                                                                                        | 凝聚力与冲突解决                            |
| 16.The team members solve conflicts and disagreements within the team completely                                         | Cohesion and<br>conflict resolution |
| 16. 团队成员能够完全在团队内部解决冲突和分歧                                                                                                 | 凝聚力与冲突解决                            |
| 17.Disagreements between the team members are solved rapidly                                                             | Cohesion and<br>conflict resolution |
| 17. 团队成员能很快地解决分歧                                                                                                         | 凝聚力与冲突解决                            |

---
